# Supplementary material for: What is the impact of underweight on self-reported health trajectories and mortality rates: a cohort study
Source: Springer Nature journal article supplement (doi:10.1186/s12955-017-0766-x), 2017-10-02
Supplement: MOESM1 [file 15099676]

Additional file 1: Table S1. Comparison of change in comorbidity (HII) according to weight group at beginning and end of follow-up period

|                                    | <b>BMI group at the end of the study</b> |        |      |                              |        |      |                            |        |      |                       |        |      | P-value<br>for SRH | P-value<br>for HII |
|------------------------------------|------------------------------------------|--------|------|------------------------------|--------|------|----------------------------|--------|------|-----------------------|--------|------|--------------------|--------------------|
|                                    | <18.5 kg/m <sup>2</sup>                  |        |      | 18.5-24.99 kg/m <sup>2</sup> |        |      | 25-29.99 kg/m <sup>2</sup> |        |      | >25 kg/m <sup>2</sup> |        |      |                    |                    |
|                                    | N                                        | SRH    | HII  | N                            | SRH    | HII  | N                          | SRH    | HII  | N                     | SRH    | HII  |                    |                    |
| <b>BMI group at start of study</b> |                                          |        |      |                              |        |      |                            |        |      |                       |        |      |                    |                    |
| <18.5 kg/m <sup>2</sup>            | 58                                       | 77.8 % | 2.22 | 150                          | 68.4 % | 0.91 | 16                         | 12.5 % | 2.13 | 0                     |        |      | <0.001             | 0.006              |
| 18.5-24.99 kg/m <sup>2</sup>       | 84                                       | 48.6 % | 3.39 | 5536                         | 69.9 % | 1.59 | 3421                       | 65.5 % | 1.57 | 324                   | 55.3 % | 1.83 | <0.001             | <0.001             |
| 25-29.99 kg/m <sup>2</sup>         | 4                                        | 0.0 %  | 0.00 | 316                          | 52.5 % | 2.10 | 2539                       | 64.3 % | 1.91 | 1365                  | 52.3 % | 2.30 | <0.001             | 0.002              |
| >30 kg/m <sup>2</sup>              | 0                                        |        |      | 10                           | 16.7 % | 3.33 | 89                         | 34.3 % | 3.22 | 643                   | 46.6 % | 2.69 | 0.143              | 0.399              |

N= count, HII = Health impact index which measures comorbidity, BMI = Body mass index, SRH = % in good health.
